# Supplementary material
Source: Springer Nature journal article supplement (https://www.springermedizin.de/resource/supplementary/13045_2012_213_MOESM2_ESM.pdf/9660874)

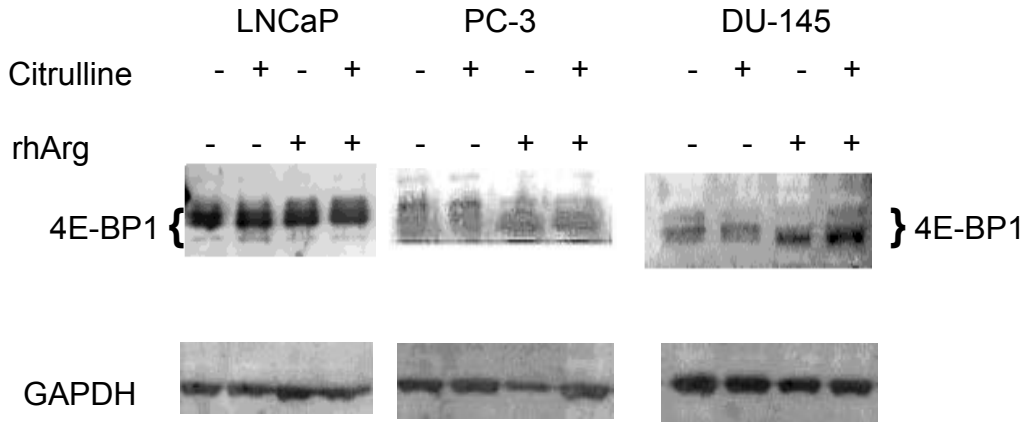

Supplement: MOESM2 [file 9660874]
